# Supplementary material for: Nutrition and Physical Activity as Modulators of Osteosarcopenic Adiposity: A Scoping Review and Recommendations for Future Research
Source: MDPI journal article supplement (doi:10.3390/nu15071619), 2023-03-27
Supplement: s1 [file s1]

**Table S1.** Characteristics and results of studies with dietary intake and/or nutritional status as independent variables related to osteosarcopenic adiposity/obesity (OSA/OSO)<sup>1</sup>

| Reference,<br>Studied topic                                                                                   | Country,<br>Setting                        | Study<br>Design                                       | Diagnostic criteria & Instruments                         |                                                  |                                             | Sample<br>size, <i>n</i> (%)                               | Age<br>(years)                         | OSA/OSO<br>Prevalence <sup>2</sup><br><i>n</i> (%)                  | Assessment<br>Tools                                                                         | Compared to <sup>3</sup>                                                                                    | Outcomes in OSA/OSO<br>group (or others if<br>indicated)                                                                                                                                                                                                                                                                                                                                                                                                                                            |
|---------------------------------------------------------------------------------------------------------------|--------------------------------------------|-------------------------------------------------------|-----------------------------------------------------------|--------------------------------------------------|---------------------------------------------|------------------------------------------------------------|----------------------------------------|---------------------------------------------------------------------|---------------------------------------------------------------------------------------------|-------------------------------------------------------------------------------------------------------------|-----------------------------------------------------------------------------------------------------------------------------------------------------------------------------------------------------------------------------------------------------------------------------------------------------------------------------------------------------------------------------------------------------------------------------------------------------------------------------------------------------|
|                                                                                                               |                                            |                                                       | Bone                                                      | Lean/Muscle                                      | Adipose                                     |                                                            |                                        |                                                                     |                                                                                             |                                                                                                             |                                                                                                                                                                                                                                                                                                                                                                                                                                                                                                     |
| Cvijetic, S,<br>2023 [16],<br>Nutritional<br>status in<br>nursing<br>homes<br>residents<br>during<br>COVID    | Croatia,<br>Six Nursing<br>Homes           | C-S<br>Inclusion/<br>Exclusion<br>criteria<br>applied | T-score ≤-1<br>for total bone<br>mass<br>With BIA-<br>ACC | S-score ≤-1<br>With BIA-<br>ACC                  | BF%:<br>F ≥32;<br>M ≥25<br>With BIA-<br>ACC | Total,<br>n=365;<br>F, n=296<br>(81);<br>M, n=69<br>(18.9) | Mean,<br>83.7<br>F, 84.3<br>M, 83.1    | Total, n=242<br>(66.3);<br>F, n=209<br>(70.8);<br>M, n=33<br>(47.8) | BIA-ACC<br>BioTekna®<br>Mini<br>Nutritional<br>Assessment<br>(MNA); Other<br>questionnaires | Normal;<br>Others,<br>combination<br>of:<br>osteoporosis<br>and/or<br>sarcopenia<br>and/or obesity<br>alone | -32.4% and 31.3% of F<br>and M were at risk for<br>malnutrition and 5.8%<br>and 6.2% of F and M,<br>respectively were<br>malnourished;<br>-No difference in<br>malnourishment or<br>risk of it in those with<br>or without OSA;<br>-No difference in OSA<br>prevalence or<br>nutritional status in<br>those with or without<br>COVID;<br>-Lower phase angle<br>(indicating lower cell<br>integrity and muscle<br>quality);<br>-Lower total bone<br>mass;<br>-Higher intramuscular<br>adipose tissue |
| Keser, I, 2021<br>[17] Several<br>nutrients;<br>Body water<br>distribution<br>in nursing<br>home<br>residents | Croatia,<br>Nursing<br>Home                | C-S<br>Inclusion/<br>Exclusion<br>criteria<br>applied | T-score ≤-1<br>for total bone<br>mass<br>With BIA-<br>ACC | S-score ≤-1<br>With BIA-<br>ACC                  | BF%:<br>F ≥32;<br>M ≥25<br>With BIA-<br>ACC | Total, n=84;<br>F, n=69 (82);<br>M, n=15<br>(18)           | Mean<br>83.5<br>Range<br>65.3-<br>95.2 | Total, n=45<br>(53.6);<br>F, n=37<br>(53.6);<br>M, n=8 (53.3)       | BIA-ACC<br>BioTekna®<br>24-h recall;<br>Other<br>questionnaires                             | Osteopenic<br>adiposity,<br>adiposity<br>alone                                                              | -Lower trend for<br>protein, omega-3, fiber,<br>Ca, Mg, K, vitamins D<br>and K intake;<br>-All participants<br>consumed nutrients<br>below<br>recommendations;<br>-Signif. higher<br>extracellular water,<br>indicating higher<br>inflammation                                                                                                                                                                                                                                                      |
| NoPlich, JZ,*<br>2019 [23]<br>Weight loss<br>with low fat                                                     | United<br>States,<br>Community<br>dwelling | Longitudi-<br>nal<br>Inclusion/<br>Exclusion          | T-score ≤-1<br>for hip<br>and/or spine<br>for             | Total lean<br>mass (kg);<br>Android<br>lean (kg) | BF%:<br>Average at<br>baseline<br>45.9      | At baseline<br>with<br>complete<br>data, n=135             | Mean<br>55.8 at<br>base-<br>line;      | Not<br>reported;<br>All three<br>body                               | iDXA;<br>Routine lab<br>equipment<br>and ELISA                                              | Baseline<br>values;                                                                                         | - <u>All participants</u> lost<br>~4%, ~3%, and ~2%<br>body weight, fat, and<br>lean mass, respectively;                                                                                                                                                                                                                                                                                                                                                                                            |

|                                                                                                                                                                                     |                                                  |                                                                                                                            |                                                                                |                                                                  |                                                                                  |                                                                                                                                                                                                                                                            |                                          |                                                                                                   |                                                                       |                                                                                                  |                                                                                                                                                                                                                                                                                                                                                                                                                                                                                                                                                                                                                                                                                                                                                                         |
|-------------------------------------------------------------------------------------------------------------------------------------------------------------------------------------|--------------------------------------------------|----------------------------------------------------------------------------------------------------------------------------|--------------------------------------------------------------------------------|------------------------------------------------------------------|----------------------------------------------------------------------------------|------------------------------------------------------------------------------------------------------------------------------------------------------------------------------------------------------------------------------------------------------------|------------------------------------------|---------------------------------------------------------------------------------------------------|-----------------------------------------------------------------------|--------------------------------------------------------------------------------------------------|-------------------------------------------------------------------------------------------------------------------------------------------------------------------------------------------------------------------------------------------------------------------------------------------------------------------------------------------------------------------------------------------------------------------------------------------------------------------------------------------------------------------------------------------------------------------------------------------------------------------------------------------------------------------------------------------------------------------------------------------------------------------------|
| dairy foods and calcium/vitamin D supplements effects on bone and body composition                                                                                                  | Caucasian, overweight/obese postmenopausal women | Criteria applied; 6-month intervention with 3 randomized groups (dairy, suppl., placebo); All samples blinded for analysis | osteopenia (no osteoporosis) With iDXA                                         | Gynoid lean (kg) With iDXA                                       | With iDXA                                                                        | (dairy, n=64, Ca/vit. D suppl., n=62, placebo, n=62); At 6-month, n=97 (dairy, n=32, Ca/vit. D suppl., n=37, placebo, n=30); Moderate energy restriction (85% of total energy needs) to all participants Dropout: 28.2%; Imputed analyses for missing data | 6.6 years since menopause                | composition components were measured and evaluated at baseline and after 6 months of intervention | (for blood and urine samples; 3-day dietary records; Activity records | Groups after 6 months of intervention                                                            | <p>-<u>Dairy group</u>: signif. higher loss in waist, hip, and abdominal circumferences and body fat (total, android); signif. lower loss in lean mass (total, android);</p> <p>-<u>Supplement group</u>: signif. lower decrease in total body, spine, radius BMD; signif. increase in femoral neck and total femur BMD</p> <hr/> <p>-<u>All participants</u> improved in (due to weight loss): cardiometabolic indices (BP, TC, triglycerides, insulin, leptin, adiponectin, ApoA1, ApoB)</p> <p>-<u>Dairy group</u>: Signif. decrease in BP, TC, LDL-C, TC/HDL-C, ApoB, leptin; signif. increase in adiponectin, ApoA1</p> <p>-<u>Supplement group</u>: Signif. decrease in BP, triglycerides, LDL-C, ApoB, leptin; signif. increase in HDL-C, adiponectin, ApoA1</p> |
| <p>NoP Ilich, JZ,* 2022 [24]; Secondary analysis to Ilich, JZ 2019 [23] Weight loss with low-fat dairy foods and calcium/vitamin D supplements effects on cardio-metabolic risk</p> |                                                  |                                                                                                                            |                                                                                |                                                                  |                                                                                  |                                                                                                                                                                                                                                                            |                                          |                                                                                                   |                                                                       |                                                                                                  |                                                                                                                                                                                                                                                                                                                                                                                                                                                                                                                                                                                                                                                                                                                                                                         |
| <sup>A</sup> Choi, M, 2021 [18] Dietary Calcium and phosphorus intake                                                                                                               | S. Korea, KNHANES 2008-2011                      | C-S Retro-spective Inclusion/Exclusion criteria applied                                                                    | T-score ≤-1 for hip and/or spine to include osteopenia & osteoporosis With DXA | SMI F ≤5.4 kg/m <sup>2</sup> ; M ≤7.0 kg/m <sup>2</sup> With DXA | BF%: F ≥32; M ≥25 With DXA BMI: kg/m <sup>2</sup> overweight t ≥23<25, obese ≥25 | Total, n=7007; F, n=3864 (55.1); M, n=3143 (44.9)                                                                                                                                                                                                          | Mean, 62.3 OSA- 65.5; More women (68.4%) | Total, n=763 (10.9) F and M combined                                                              | DXA 24-h recall                                                       | Total of 8 groups: Normal and combinations: osteoporosis, and/or sarcopenia and/or obesity alone | <p>-Lower calcium intake signif. associated with osteosarcopenia and OSA;</p> <p>-Lower phosphorus intake signif. associated with sarcopenic adiposity;</p> <p>- Ca/P ratio (below median) signif.</p>                                                                                                                                                                                                                                                                                                                                                                                                                                                                                                                                                                  |

|                                                                                                |                                                                                                             |                                                         |                                                                                  |                                                                       |                                                                                |                                                                      |                                    |                                                       |                                                                                   |                                                                                                                                |                                                                                                                                                                                                                                                                                        |
|------------------------------------------------------------------------------------------------|-------------------------------------------------------------------------------------------------------------|---------------------------------------------------------|----------------------------------------------------------------------------------|-----------------------------------------------------------------------|--------------------------------------------------------------------------------|----------------------------------------------------------------------|------------------------------------|-------------------------------------------------------|-----------------------------------------------------------------------------------|--------------------------------------------------------------------------------------------------------------------------------|----------------------------------------------------------------------------------------------------------------------------------------------------------------------------------------------------------------------------------------------------------------------------------------|
|                                                                                                |                                                                                                             |                                                         |                                                                                  |                                                                       |                                                                                |                                                                      |                                    |                                                       |                                                                                   |                                                                                                                                | associated with osteopenic adiposity<br>-Signif. lower activity in OSA compared to normal group                                                                                                                                                                                        |
| <sup>A</sup> Choi, M, 2020 [19]<br>Protein intake: total and plant-based                       | S. Korea, KNHANES 2008-2009                                                                                 | C-S Retro-spective Inclusion/Exclusion criteria applied | T-score ≤-1 for hip and/or spine to include osteopenia & osteoporosis With DXA   | ALM/Weight <1SD of Korean reference population (20-39 y old) With DXA | BF%: F ≥32; M ≥25 With DXA BMI: kg/m <sup>2</sup> overweight ≥23<25, obese ≥25 | Total, n=1351; F, n=706; M, n=645                                    | Mean 60.5; F-OSA 65.5 M-OSA 63.8   | Total, n=865 (64.0); F, n=649 (91.9); M, n=216 (33.4) | DXA 24-h recall                                                                   | Normal, only; No other groups were considered                                                                                  | -M >65 y consuming <0.91 g/kg of protein (Korean recommend.) had 5.8 higher odds of developing OSO;<br>-Plant-based protein intake in M-OSO was higher than in M-normal.<br>-Energy consumption in M-OSA higher than in M-normal.<br>-Signif. lower intense physical activity in M-OSO |
| Bae, Y-J, 2020 [20]<br>Fruit intake, vitamin C, potassium                                      | S. Korea KNHANES 2008- 2010                                                                                 | C-S Retro-spective Inclusion/Exclusion criteria applied | T-score ≤-1 for hip and/or spine to include osteopenia & osteoporosis With DXA   | ALM/weight <1SD of reference population                               | Waist circumference ≥85 cm                                                     | Total, n=1420 F only                                                 | Range 50-64; OSO 58                | n=194 (13.7)                                          | DXA, 24-h recall                                                                  | Normal; osteopenia/osteoporosis; sarcopenia; and/or obesity                                                                    | -Signif. lower intake of potassium and vitamin C;<br>- Signif. lower intake of fruits rich in vitamin C and potassium                                                                                                                                                                  |
| <sup>A</sup> de Franca, NAG, 2020 [21]<br>Dietary intake, muscle strength, sedentary lifestyle | Brazil; Community dwelling; Health Survey of the City of São Paulo. (ISA-Capital 2015) (2015 ISA-Nutrition) | C-S Inclusion/Exclusion criteria applied                | T-score ≤-1 for hip and/or spine to include osteopenia and osteoporosis With DXA | ALM/BMI F <0.512 M <0.789 With DXA                                    | FMI M>9 kg/m <sup>2</sup> ; F>13 kg/m <sup>2</sup> with DXA                    | Total, n=218; F, n=113 (52); M, n=105 (48); older adults, n=161 (74) | Mean 63; Range 59-69               | Total, n=14 (6.4) F and M combined                    | DXA 24-h recall; Handgrip with Jamar® dynamometer; Gait speed usual pace, 4 m/min | Normal + 6 groups: osteopenia/osteoporosis; sarcopenia; obesity; osteopenic sarcopenia; osteopenic obesity; sarcopenic obesity | - Signif. lower protein intake (g/kg/Wt) but not as % of energy;<br>-None of other nutrients were signif. different among groups;<br>- Signif. lower grip strength and more time spent sitting                                                                                         |
| <sup>NoP</sup> Cervo, MM, 2020 [25]<br>Energy-adjusted Dietary inflammatory                    | Australia: Population-based community dwelling; Southern                                                    | Prospective; with follow-up at 5 and 10 years;          | Changes in T-score ≤-1 for hip and/or spine to include                           | Changes in ALM whole-body DXA; Hand grip strength;                    | Baseline BF%: F ~40 M ~28                                                      | Total at baseline, n=1098; F, n=562 (51);                            | Mean at baseline : 63; Range 51-79 | Not reported; For every unit increase in E-DII        | DXA, FFQ to calculate E-DII scores; Dynamometers for changes                      | With baseline values and changes at five and 10 years of follow-up                                                             | -Consumption of pro-inflammatory diet (higher E-DII scores), increased incidence of fractures over 10 years in M, but not in F,                                                                                                                                                        |

|                                                                                                            |                              |                                                         |                                                                                 |                                                               |                                                                                       |                                                      |                                        |                                                                    |                                                                                                                   |                                                                                                                                                                                          |                                                                                                                                                                                                                                                                          |
|------------------------------------------------------------------------------------------------------------|------------------------------|---------------------------------------------------------|---------------------------------------------------------------------------------|---------------------------------------------------------------|---------------------------------------------------------------------------------------|------------------------------------------------------|----------------------------------------|--------------------------------------------------------------------|-------------------------------------------------------------------------------------------------------------------|------------------------------------------------------------------------------------------------------------------------------------------------------------------------------------------|--------------------------------------------------------------------------------------------------------------------------------------------------------------------------------------------------------------------------------------------------------------------------|
| y index (E-DII)                                                                                            | Tasmania, TASOAC 2002-2004   | Inclusion/Exclusion criteria applied                    | osteopenia & osteoporosis; With DXA                                             | Knee extension; fall risks                                    | With whole-body DXA BMI kg/m <sup>2</sup> : F ~28 M ~ 27.7                            | M, n=536 (49); At 5 years, n=768; At 10 years, n=566 |                                        | score, Incidence fracture increased 9% in M but decreased 12% in F | in grip strength and knee extension; PPA for changes in fall risk; Self - assessment questionnaires for fractures | despite being associated with reductions in lumbar spine and total hip BMD in both sexes; -E-DII scores signif. associated with higher fall risk scores and lower ALM in M but not in F. |                                                                                                                                                                                                                                                                          |
| Park S, 2018 [22] Dietary inflammatory index (DII); Higher scores denote higher proinflammatory diet       | S. Korea, KNHANES, 2009-2011 | C-S Retro-spective Inclusion/Exclusion criteria applied | T-score ≤-1 for hip and/or spine to include osteopenia & osteoporosis; With DXA | ALM/weight <1SD of reference population; with DXA             | BMI: kg/m <sup>2</sup> based on Asian-Pacific guidelines overweight ≥23<25, obese ≥25 | Total, n=1344 F only                                 | Mean 62.3; OSO 64                      | Total, n=455 (31.8)                                                | DXA, 24-h recall, DII score                                                                                       | Normal, osteosarcopenia, osteopenic obesity, sarcopenic obesity                                                                                                                          | -DII scores signif. associated with higher risk for OSO; -Groups with osteosarcopenia, osteopenic obesity, sarcopenic obesity had signif. lower intake of vitamins C and E compared to the normal group                                                                  |
| Kim J, 2017 [15] Diet Quality-Index-International (DQI-I); higher scores denote better food quality intake | S. Korea KNHANES 2008-2010   | C-S Retro-spective Inclusion/Exclusion criteria applied | T-score ≤-1 (for Asian reference population) With DXA                           | ALM/Wt <1SD of Korean reference population (20-39 y) With DXA | BF% ≥40 of body fat by gender With DXA                                                | Total, n=6129; F, n=3550; M, n=2579                  | F 61.9; M 60.8; OSO F 64.3; OSO M 64.2 | F 25%; M 13.5%                                                     | DXA, 24-h recall                                                                                                  | Healthy Korean adults aged 20–39 years                                                                                                                                                   | -In F: Higher scores on the DQI-I associated with better body composition phenotypes; -Signif. less intake of fish, mushrooms, milk, energy, protein -Tendency to less intake of meat, eggs; -In M: DQI-I scores were not associated with body composition abnormalities |

<sup>1</sup>OSA/OSO terms are used interchangeably and reflect those used in each article. <sup>2</sup>Prevalence includes both pre- (with osteopenia and/or presarcopenia) and full OSA/OSO; <sup>3</sup>OSA/OSO participants were compared to those with one or more body composition impairments (e.g., osteopenia/osteoporosis, osteosarcopenia, sarcopenia, sarcopenic obesity, obesity/adiposity alone), or normal. <sup>NoP</sup>Studies Not reporting/calculating the Prevalence of OSA/OSO, but still analyzing three body composition compartments from which OSA/OSO prevalence and/or its relation to exposure variables could be derived. \*Studies with the same population, design, and intervention, but different independent/exposure variables. <sup>A</sup>Studies reporting association with physical Activity or sedentary lifestyle, in addition to nutrition. Abbreviations: COVID: coronavirus disease; C-S: cross-sectional; T-score for bone mineral density (BMD g/cm<sup>2</sup>); BIA-ACC: Bioelectrical Impedance Analysis with BioTekna®; S-score for muscle; BF: Body Fat; NHR: Nursing home residents; F: females; M: males; DXA: Dual Energy Absorptiometry; BMD: Bone Mineral Density; BP: Blood Pressure; TC: Total Cholesterol; ApoA1: Apolipoprotein A1; ApoB: apolipoprotein B; LDL-C: Low Density Lipoprotein Cholesterol; HDL-C: High Density Lipoprotein Cholesterol; KNHANES: Korea National Health and Nutrition Examination

Survey; SMI: Skeletal Muscle Index (kg/height<sup>2</sup>); ALM: Appendicular Lean Mass; BMI: Body Mass Index; FMI: Fat Mass Index (body fat/height<sup>2</sup>); TASOAC: Tasmanian Older Adult Cohort Study; E-DII score: Dietary Inflammatory Index; FFQ: Food Frequency Questionnaire; PPA: Physical Profile Assessment; DQI-I: Quality Index-International.

**Table S2.** Characteristics and results of studies with serum nutritional biomarkers as independent variables related to osteosarcopenic adiposity/obesity (OSA/OSO)<sup>1</sup>

| Reference, Studied topic                                                                | Country Setting                                 | Study Design                                             | Diagnostic criteria & Instruments                                               |                                                   |                                         | Sample size n (%)                                 | Age (years)                                          | OSA/OSO Prevalence <sup>2</sup> (%) | Assessment Tools                                                   | Compared to <sup>3</sup>                                             | Outcomes in OSA/OSO group (or others if indicated)                                                                                                                                                           |
|-----------------------------------------------------------------------------------------|-------------------------------------------------|----------------------------------------------------------|---------------------------------------------------------------------------------|---------------------------------------------------|-----------------------------------------|---------------------------------------------------|------------------------------------------------------|-------------------------------------|--------------------------------------------------------------------|----------------------------------------------------------------------|--------------------------------------------------------------------------------------------------------------------------------------------------------------------------------------------------------------|
|                                                                                         |                                                 |                                                          | Bone                                                                            | Lean/Muscle                                       | Adipose                                 |                                                   |                                                      |                                     |                                                                    |                                                                      |                                                                                                                                                                                                              |
| Chung, S-J, 2022 [27]<br>Serum ferritin; Subjects stratified by serum ferritin tertiles | S. Korea, Medical health screening and check-up | C-S Two-center; Inclusion/Exclusion criteria applied     | T-score ≤-1 for hip and/or spine to include osteopenia & osteoporosis; With DXA | SMI <1SD of reference population; With BIA        | BF%: F ≥35; M ≥25 With DXA              | Total, n=25,546; F, n=16,912; M, n=8634           | Mean, 58.7; F, 58.3; M, 59.6; F-OSO 66.3; M-OSO 67.7 | Total, 7.9%; F, 6.4%; M, 9.4%       | DXA; InBody-720; Cobas 8000 (for ferritin), Roche Diagnostics      | Normal; combinations: osteoporosis, and/or sarcopenia and/or obesity | -Higher serum ferritin signif. associated with combined adverse body composition in F, but not in M; -F in the highest ferritin tertiles had the highest OSO prevalence                                      |
| <sup>NoP</sup> Ma, Y, 2020 [28]<br>25(OHD); Subjects stratified by 25(OH)D tertiles     | China Nine province s,(comm unities)            | C-S Inclusion/Exclusion criteria applied                 | T-score ≤-1 for hip and/or spine to include osteopenia & osteoporosis With DXA  | ALM; <1SD than mean; F 13.9 kg M 20.2 kg With DXA | BF%: F 36 M 27.5 With whole-body DXA    | Total, n=4506; F, n=2905 (64.5); M, n=1601 (33.5) | Mean: 68.1; F, 67.6 M, 68.6                          | Not reported                        | DXA; Liquid chromatogra phy–tandem mass spectrometry (for 25(OH)D) | Osteopenic obesity, Sarcopenic obesity, Obesity-only                 | -25(OHD) deficiency associated with greater likelihood of OSO; -Independent negative dose-response associations of 25(OHD) with OSO and other impaired body composition components                           |
| <sup>A</sup> Kim, YM, 2019 [29]<br>Serum 25(OH)D                                        | S. Korea KNHAN ES V, 2008-2011                  | Retro-spective; Inclusion/Exclusion criteria applied     | T-score ≤-1 for hip and/or spine to include osteopenia & osteoporosis With DXA  | ALM/Weigh t <1SD of reference population With DXA | BF%: F ≥35; M ≥ 25                      | Total, n=3267; F, n=2187; M, n=1080               | Mean 64.2; F 63.8; M 64.6; F-OSO 66.3; M-OSO 67.7    | Total 36.1%; F, 40.1%; M, 28.1%     | DXA; Radioimmun o assay (DiaSorin) with 1470 Wizard γ-counter      | Osteopenic obesity, Sarcopenic obesity, Obesity-only                 | -Both F-OSO and M-OSO had signif. lower serum 25(OH)D (<20 ng/mL); -Both F and M engaged in the lowest physical activity; -F-OSO had the highest prevalence of hypertension, diabetes and metabolic syndrome |
| Kim, J, 2017 [30]<br>Serum 25(OHD)                                                      | S. Korea KNHAN ES IV, 2008-2010                 | C-S Retro-spective; Inclusion/Exclusion criteria applied | T-score ≤-1 (for Asian reference population) With DXA                           | ALM <1SD of ref. population With DXA              | BF% ≥ 40 of body fat by gender With DXA | Total, n=5908; F, n=3423; M, n=2485               | Mean 61.2; F 61.7; M 60.7; F-OSO 64.2; M-OSO 63.9    | Total, 19.3%; F, 25%; M, 13.5%      | DXA; DiaSorin (for 25(OH)D); 24-h recall                           | Osteopenic obesity, Sarcopenic obesity, Obesity-only                 | -Signif. higher prevalence of 25(OH)D (<20 ng/mL) in both F and M; -Higher 25(OH)D in mid- and later life signif. associated with reduced odds of adverse body composition, leading to OSA (stronger in M)   |

<sup>1</sup> OSA/OSO terms are used interchangeably and reflect those used in each article. <sup>2</sup>Prevalence includes both pre- (with osteopenia and/or presarcopenia) and full OSA/OSO;

<sup>3</sup>OSA/OSO participants compared to those with one or more body composition impairments (e.g., osteopenia/osteoporosis, osteosarcopenia, sarcopenia, sarcopenic obesity, obesity/adiposity alone), or normal. <sup>NoP</sup>Studies not reporting/calculating the prevalence of OSA/OSO, but still analyzing three body composition compartments from which

OSA/OSO prevalence and/or its relation to exposure variables could be derived. <sup>A</sup>Studies reporting association with physical activity or sedentary lifestyle, in addition to nutrition. C-S: cross-sectional; T-score for bone mineral density (BMD, g/cm<sup>2</sup>); DXA: Dual Energy Absorptiometry; SMI: Skeletal Muscle Index (kg/height<sup>2</sup>); BIA-ACC: Bioelectrical Impedance Analysis with BioTekna®; BF: Body Fat; F: females; M: males; 25(OHD): 25-hydroxyvitamin D; ALM: Appendicular Lean Mass; KNHANES: Korea National Health and Nutrition Examination Survey.

**Table S3.** Characteristics and results of studies with physical activity as independent variables related to osteosarcopenic adiposity/obesity (OSA/OSO)<sup>1</sup>

| Reference,<br>Studied topic                                                                                                                   | Country,<br>Setting                                  | Study<br>Design                                                                                                                                       | Diagnostic criteria & Instruments                                                                                                                                                                                                                              |                                                                                               |                         | Sample size (n),<br>Intervention                                                                                                                              | Age<br>(years)                               | Prevalence <sup>2</sup><br>n (%)                        | Assessment<br>Tools                                                                                      | Compared<br>to <sup>3</sup>                                                                                                      | Outcomes in<br>OSA/OSO group (or<br>others if indicated)                                                                                                                                                                                                                                                      |
|-----------------------------------------------------------------------------------------------------------------------------------------------|------------------------------------------------------|-------------------------------------------------------------------------------------------------------------------------------------------------------|----------------------------------------------------------------------------------------------------------------------------------------------------------------------------------------------------------------------------------------------------------------|-----------------------------------------------------------------------------------------------|-------------------------|---------------------------------------------------------------------------------------------------------------------------------------------------------------|----------------------------------------------|---------------------------------------------------------|----------------------------------------------------------------------------------------------------------|----------------------------------------------------------------------------------------------------------------------------------|---------------------------------------------------------------------------------------------------------------------------------------------------------------------------------------------------------------------------------------------------------------------------------------------------------------|
|                                                                                                                                               |                                                      |                                                                                                                                                       | Bone                                                                                                                                                                                                                                                           | Lean/Muscle                                                                                   | Adipose                 |                                                                                                                                                               |                                              |                                                         |                                                                                                          |                                                                                                                                  |                                                                                                                                                                                                                                                                                                               |
| Lee, Y-H, 2021<br>[31]<br>Progressive<br>resistance<br>training<br>(peRET) effects<br>on functional<br>performance<br>and body<br>composition | Taiwan,<br>Community<br>dwelling<br>women            | Inclusion/<br>Exclusion<br>Criteria applied;<br>12-week<br>intervention<br>with 2<br>randomized<br>groups;<br>Blinded<br>randomization<br>into groups | T-score ≤-1<br>for spine to<br>include<br>osteopenia &<br>osteoporosis;<br>With DXA                                                                                                                                                                            | SMI <5.67<br>kg/m <sup>2</sup> ; AND<br>grip strength<br><20 kg; OR<br>gait speed<br><0.8 m/s | BF%:<br>≥35             | Total, n=27;<br>peRET, n=15;<br>40 min, three<br>times/w;<br>OR<br>Control, n=12;<br>No dropouts;<br>>85% exercise<br>compliance;<br>Follow-up at 6<br>months | Mean<br>70.9;<br>No diff.<br>among<br>groups | All<br>participants,<br>as per<br>inclusion<br>criteria | DXA; BIA<br>Dynamometer,<br>Thera-Band®                                                                  | Baseline<br>values;<br>Control<br>group of<br>OSO<br>women<br>(attended<br>group<br>lectures<br>with<br>educational<br>material) | -Signif. increase in<br>BMD and T-score for<br>spine<br>-Signif.<br>improvement in<br>Functional Forward<br>Reach; Timed up-<br>and-go test; Timed<br>chair-rise test; Gait<br>speed;<br>-No change in BF%,<br>and some lean tissue<br>parameters;<br>-No sustainable<br>benefits after 6<br>months follow-up |
| Shen, LL, 2020<br>[36]<br>Aerobic<br>exercise and<br>resistance<br>training<br>combined<br>effects on body<br>composition                     | China,<br>Community<br>dwelling,<br>women and<br>men | Inclus/Exclusion<br>Criteria applied;<br>12-week<br>intervention<br>with 2<br>randomized<br>groups; No<br>mention on<br>assessor<br>blinding          | T-score ≤-1<br>to include<br>osteopenia &<br>osteoporosis;<br>With DXA                                                                                                                                                                                         | SMI<br>F ≤5.4 kg/m <sup>2</sup> ;<br>M ≤7.0<br>kg/m <sup>2</sup>                              | BF%:<br>F ≥35;<br>M ≥25 | Total, n=30;<br>Exercise, n=15;<br>45-60 min/day,<br>3 times/weak;<br>OR<br>Control, n=15;                                                                    | >60<br>No diff.<br>between<br>groups         | All<br>participants,<br>as per<br>inclusion<br>criteria | DXA; BIA<br>Dynamometer,<br>Elastic band                                                                 | Control<br>group of<br>OSO<br>women and<br>men                                                                                   | -Signif. increase in<br>BMD and decrease<br>in BF%;<br>- No change in SMI                                                                                                                                                                                                                                     |
| <sup>NoP</sup> Cunha, PM,<br>2018 [32]<br>Resistance<br>training<br>volume (1 & 3<br>sets) effects on<br>bone, muscle<br>and body fat         | Brazil,<br>Community<br>dwelling,<br>women           | Inclusion/<br>Exclusion<br>Criteria applied;<br>12-week<br>intervention<br>with 3<br>randomized<br>groups;                                            | No specific identification for bone,<br>muscle and body fat status.<br><br>Composite OSO Z-score derived from<br>average of the muscular strength,<br>SMM, % body fat, and BMD<br>components was calculated by formula:<br>(muscular strength Z-score)+(SMM Z- |                                                                                               |                         | Total, n=62;<br>Intervention<br>groups:<br>1-set training<br>(n=21, for 15<br>min);<br>OR                                                                     | Mean<br>67.4;<br>No diff.<br>among<br>groups | Not<br>reported                                         | DXA;<br>Repetition<br>Maximum<br>(RM) by chest<br>press, knee<br>extension,<br>preacher curl<br>exercise | Baseline<br>values;<br>Also, 1 set<br>vs. 3 sets of<br>training;<br>Control<br>group                                             | -Signif, increase in<br>total strength; SMM;<br>-Signif improvement<br>in OSO Composite<br>Z-score from<br>baseline to-post test<br>-Signif, decrease in<br>body fat;                                                                                                                                         |



|                                                                                                             |                                                                                                                |                                                                                                                                                                |
|-------------------------------------------------------------------------------------------------------------|----------------------------------------------------------------------------------------------------------------|----------------------------------------------------------------------------------------------------------------------------------------------------------------|
|                                                                                                             |                                                                                                                | -NO change in Triglycerides; Triglyceride-glucose index; triglyceride-glucose-waist circumference index; C-reactive protein; Metabolic syndrome severity score |
| Hashemi, A,*<br>2020 [37]<br>Elastic band resistance training effects on vascular aging, serum microRNA-146 | Total, n=48;<br>Training, n=26<br>OR<br>Control, n=22;<br>Intention to treat analysis; 85% exercise compliance | -Signif. decrease in serum miR-146; total cholesterol, LDL<br>-Signif. increase in HDL;<br>-NO difference in body weight, BMI, BMD, C-reactive protein         |
| Kazemipour, N* 2022 [38]<br>Elastic band resistance training effects on IGF-1 and FGF-2                     |                                                                                                                | -Signif. increase in IGF-1 and FGF-2<br>NOT significant: Relationship of IGF-1 and FGF-2 with BMD<br>-NO change in BMD                                         |

<sup>1</sup>OSA/OSO terms are used interchangeably and reflect those used in each article. <sup>2</sup>Prevalence includes both pre- (with osteopenia and/or presarcopenia) and full OSA/OSO; <sup>3</sup>OSA/OSO participants compared to those with one or more body composition impairments (e.g., osteopenia/osteoporosis, osteosarcopenia, sarcopenia, sarcopenic obesity, obesity/adiposity alone), or normal. <sup>NoP</sup>Studies not reporting/calculating the prevalence of OSA/OSO, but still analyzing three body composition compartments from which OSA/OSO prevalence and/or its relation to exposure variables could be derived. \*Studies with the same population, design, and intervention, but different independent/exposure variables. T-score for bone mineral density (BMD g/cm<sup>2</sup>); DXA: Dual Energy Absorptiometry; SMI: Skeletal Muscle Index (kg/height<sup>2</sup>); BF: Body Fat; BIA: Bioelectrical Impedance Analysis; F: Female; M: Male; SMM: Skeletal Muscle Mass; BMI: Body Mass Index; ELISA: Enzyme-Linked Immunosorbent Assay; FRAX- score: Fracture Risk Assessment; 25(OH)D: 25 hydroxyvitamin D (calcitonin); IGF-1= insulin growth factor; FGF-2- fibroblast growth factor; LDL: Low Density Lipoproteins; HDL: High Density Lipoproteins.
